# Supplementary material
Source: publisher figshare collection journal article supplement (https://karger.figshare.com/ndownloader/files/38901204)
Supplement: Supplementary file 1 [file 38901204]

|  |  | **Moderate TBIat admissionb** | | | **Severe TBI at admissionb** | | | **Fatal TBIc** | | |
| --- | --- | --- | --- | --- | --- | --- | --- | --- | --- | --- |
|  |  |  |  | |  |  | |  |  | |
| **Variable** | **Number of person-years (x 1000)** | **No. of cases** | **Crude**  **IR (95% CI)** | **Standardized IR (95% CI)** | **No. of cases** | **Crude**  **IR (95% CI)** | **Standardized IR (95% CI)** | **No. of cases** | **Crude**  **IR (95% CI)** | **Standardized IR (95% CI)** |
| Overall | 5242.0 | 274 | 5.2 (4.6-5.9) | 4.5 (4.0-5.1) | 374 | 7.1 (6.4-7.9) | 6.6 (5.9-7.4) | 235 | 4.5 (3.9-5.1) | 3.3 (2.8-3.8) |
| Age, years |  |  |  |  |  |  |  |  |  |  |
| 17-19 | 269.2 | 16 | 5.9 (3.6-9.7) | NA | 38 | 14.1 (10.3-19.4) | NA | 15 | 5.6 (3.4-9.2) | NA |
| 20-24 | 441.0 | 24 | 5.4 (3.6-8.1) | NA | 45 | 10.2 (7.6-13.7) | NA | 17 | 3.9 (2.4-6.2) | NA |
| 25-29 | 410.7 | 11 | 2.7 (1.5-4.8) | NA | 22 | 5.4 (3.5-8.1) | NA | 6 | 1.5 (0.7-3.3) | NA |
| 30-39 | 883.8 | 19 | 2.1 (1.4-3.4) | NA | 32 | 3.6 (2.6-5.1) | NA | 9 | 1.0 (0.5-2.0) | NA |
| 40-49 | 929.9 | 38 | 4.1 (3.0-5.6) | NA | 41 | 4.4 (3.2-6.0) | NA | 16 | 1.7 (1.1-2.8) | NA |
| 50-59 | 867.6 | 45 | 5.2 (3.9-6.9) | NA | 40 | 4.6 (3.4-6.3) | NA | 22 | 2.5 (1.7-3.9) | NA |
| 60-69 | 687.4 | 39 | 5.7 (4.1-7.8) | NA | 46 | 6.7 (5.0-8.9) | NA | 24 | 3.5 (2.3-5.2) | NA |
| 70-79 | 426.7 | 33 | 7.7 (5.5-10.9) | NA | 47 | 11.0 (8.3-14.7) | NA | 42 | 9.8 (7.3-13.3) | NA |
| 80-89 | 273.6 | 35 | 13.8 (9.2-17.8) | NA | 47 | 17.2 (12.9-22.9) | NA | 61 | 22.3 (17.3-28.7) | NA |
| 90+ | 52.2 | 14 | 26.8 (15.9-45.3) | NA | 16 | 30.7 (18.8-50.1) | NA | 23 | 44.1 (29.3-66.4) | NA |
| Sex |  |  |  |  |  |  |  |  |  |  |
| Female | 2622.8 | 93 | 3.5 (2.9-4.3) | 2.7 (2.0-3.3) | 97 | 3.7 (3.0-4.5) | 3.0 (2.3-3.7) | 84 | 3.2 (2.6-4.0) | 2.0 (1.5-2.5) |
| Male | 2619.2 | 181 | 6.9 (6.0-8.0) | 6.4 (5.4-7.4) | 277 | 10.6 (9.4-11.9) | 10.2 (9.0-11.5) | 151 | 5.8 (4.9-6.8) | 4.7 (3.9-5.5) |
| Period |  |  |  |  |  |  |  |  |  |  |
| 2004-2009 | 2669.5 | 150 | 5.6 (4.8-6.6) | 5.1 (4.3-6.0) | 213 | 8.0 (7.0-9.1) | 7.9 (6.7-9.0) | 118 | 4.4 (3.7-5.3) | 3.5 (2.7-4.2) |
| 2010-2014 | 2572.4 | 124 | 4.8 (4.0-5.7) | 3.9 (3.2-4.7) | 161 | 6.3 (5.4-7.3) | 5.4 (4.5-6.3) | 117 | 4.5 (3.8-5.5) | 3.1 (2.5-3.8) |

Supplementary table 1: Crude and standardizeda incidence rates per 100 000 person-years, overall and by age, sex and 5-year period.*

CI, Confidence interval. IR, incidence rate. NA, not applicable. TBI, traumatic brain injury.

*Analyses were performed by Stata/MP 17.0 for Windows version.

aAccording to the World Health Organization’s world standard population.

bSeverity of TBI is defined by Glasgow coma scale score at admission.

cIn two patients survival status was missing.
